# Supplementary material for: What do we know: positive impact of hip-hop pedagogy on student's learning effects
Source: Front Sports Act Living. 2025 Jan 6;6:1490432. doi: 10.3389/fspor.2024.1490432 (PMC11743477; doi:10.3389/fspor.2024.1490432)
Supplement: Supplementary file 1 [file Table1.xlsx]

## Sheet: Sheet1
Search methodology keywords and fields used to locate articles
Web of science	Search Terms 1	TI = (“Learning Outcome” OR “Learning Effectiveness” OR “Learning Achievement” OR “Learning Effect” OR “Learning Performance” OR “Learning Gain” OR “learning outcome” OR “learning achievement” OR “learning performance” OR “academic achievement” OR “academic performance” OR “learning perception” OR “learning attitude” OR “learning motivation” OR “learning experiences” OR “satisfaction” OR “percept…
	Search Terms 2	ALL = ( “hip hop pedagogy” OR “hip-hop pedagogy” OR “hip-hop based education” OR “hip-hop element” OR “hip-hop culture” OR "hiphop education" OR "hip-hop education" OR "Hiphop education" OR "Hip-Hop education" OR "pedagogy of education" OR “pedagogy” OR “pedagogical orientation” OR “pedagogical practices" OR “Hip-Hop Based Education”)
	Search Terms 3	ALL = ("student" OR "learner" )
Scopus	Search Terms 1	TITLE-ABS-KEY ( "Learning Outcome" OR "Learning Effectiveness" OR "Learning Achievement" OR "Learning Effect" OR "Learning Performance" OR "Learning Gain" OR "learning outcome" OR "learning achievement" OR "learning performance" OR "academic achievement" OR "academic performance" OR "learning perception" OR "learning attitude" OR "learning motivation" OR "learning experiences" OR "satisfaction" O…
	Search Terms 2	( TITLE-ABS-KEY ( "hip hop pedagogy" OR "hip-hop pedagogy" OR "hip-hop based education" OR "hip-hop element" OR "hip-hop culture" OR "hiphop education" OR "hip-hop education" OR "Hiphop education" OR "Hip-Hop education" OR "Hip-Hop Based Education" OR "hiphop pedagogy" OR "hiphop" OR "hip-hop" OR "hip hop" ) )
	Search Terms 3	( TITLE-ABS-KEY ( "student" OR "learner" ) )
