# Supplementary material for: What do we know: positive impact of hip-hop pedagogy on student's learning effects
Source: Front Sports Act Living. 2025 Jan 6;6:1490432. doi: 10.3389/fspor.2024.1490432 (PMC11743477; doi:10.3389/fspor.2024.1490432)
Supplement: Supplementary file 2 [file Table2.xlsx]

## Sheet: Criterria
Inclusion criteria	Exclusion criteria
Investigation of at least one aspect of improving learning effect, such as Cultural identity, critical thinking, and engagement.	Book, book chapters，and conference papers
Hip-hop pedagogy as intervention measure, such as DJ, breakdance, MC, knowledge, cypher, and graffiti.	The sample does not involve student groups
English language	No hip-hop pedagogy content or learning efficiencies involved
Journal articles published	Systematic literature review
