# Supplementary material for: What do we know: positive impact of hip-hop pedagogy on student's learning effects
Source: Front Sports Act Living. 2025 Jan 6;6:1490432. doi: 10.3389/fspor.2024.1490432 (PMC11743477; doi:10.3389/fspor.2024.1490432)
Supplement: Supplementary file 3 [file Table3.xlsx]

## Sheet: 第二版（简化）
No	Full reference	Country	Research question or focus	Sample and Research duration	Methods and Data collection	RQ1 and RQ2
1	Roger D. Wessel&Kerry A. Wallaert，2011	USA	How hip-hop culture impacts the undergraduate learning experience.	n=11. College. 6 females and 5 males. Age from 17-23 Duration is not clearly stated.	1.Qualitative phenomenological approach. 2.Semi-structured individual interviews to collect data	RQ1: Concerns about hip-hop Culture Influencing the Educational Experience of Undergraduate Students. RQ2: Hip-hop pedagogy had a positive impact on the students' learning experiences, particularly in the areas of socialization, personal expression, goal-setting, and cultural appreciation.
2	Adam J Kruse，2020	USA	To explore the experiences and perspectives of the majority of students of color in a hip-hop course led by a white music teacher.	n=18. High school. 15-19 years 18 weeks.	1.An exploratory study that is based on qualitative research methods and incorporates elements of hip-hop. 2.Collected and analyzed data through a cyclical process of observation, analysis, and confirmation.	RQ1: Integrate hip-hop music practices into teaching methods, such as sampling, mixing, and improvisation. RQ2: Helping students better understand and engage with course content, and developing cross-cultural competencies, better understanding their peers.
3	Liz Przybylski，2018	USA	Exploring the use of bilingual hip-hop music as a practice in educational contexts.	The research subjects include musicians (aged 28), teachers, and students. No definite age Duration is not clearly stated.	1.Mixed ethnographic approach. 2.(1) In terms of qualitative research, the article used the "mixed ethnography" method combining in-person and digital participant observation. (2) In terms of quantitative research, through an online questionnaire survey.	RQ1: Hip-hop music provides them with a channel to express their own voices. RQ2: Helping students memorize words and phrases, infer word meanings, practice language fluency, and maintain autonomous interest in learning.
4	Nickolaus A. Ortiz et al.，2018	USA	How does hip-hop music hinder or complement students' learning of statistics?	n=17. High school. 15 white students and 2 Asian students. 2 weeks.	1.Mixed research method. 2.Teachers' teaching practices and student feedback surveys.	RQ1: Using hip-hop music as a teaching tool, integrating it with the content of statistics. RQ2: Help elucidate the connection between culture and mathematics, by altering the learning norms and teaching strategies that typically underpin traditional instruction.
5	Christopher Emdin and Edmund Adjapong et al.,2016	USA	Using of hip-hop-based interventions as a teaching and treatment method, applied to STEM (Science, Technology, Engineering, and Mathematics) education, particularly for urban youth of color.	n=10. High school. Primarily Latino and African American. One semester.	1.Qualitative research method. 2.(1) Qualitative research methods, including one-on-one interviews with students, collecting students' science-themed rap lyrics, and making observational records. (2) The researchers used qualitative coding techniques, such as member checking and thematic coding, to analyze the collected data.	RQ1: Writing and performing rap songs with science content, as well as participating in competitions/battles to showcase the written content. RQ2:(1) Expressing emotions, gained a significant amount of content knowledge. (2) Reshaping scientific identity and perspectives.
6	Yue Shen et al.,2020	China	Exploring the promoting effect of street dance training on the executive function of preschool children.	n=60. Kindergarten. 4 years old. 30 are in the street dance training group and 30 are in the control group. 8 weeks.	1.Quantitative experimental research method. 2.Pre-test-post-test experimental. Objectively measure and statistically analyze participants' executive functions.	RQ1: Using hip-hop dance as a training component. RQ2:8 weeks of street dance training can effectively promote the development of executive function in preschool children.
7	Amity C. Lutes et al.，2021	USA	The effects of hip-hop Instructional Methods on Fifth graders' Math achievement improvement.	n=113. Fifth grade. Primary school. 52 boys and 61 girls. 4 weeks.	1.Mixed-methods study. 2.Quantitative data (pre-tests-post-tests experimental) and qualitative data (student essays and teacher interviews). Explanatory sequential design, first collecting quantitative data and then collecting qualitative data to further explain the quantitative results.	RQ1: Applying hip-hop pedagogy of rap songs, break dance, cypher, and rap battle to the math curriculum. RQ2: HHBE can be an effective strategy to improve the math performance of students in high-minority, low-income schools. (1) Rap songs and dance help students memorize key concepts. (2) Sampling strategies allow students to apply existing knowledge to create new knowledge. (3) Cypher and rap b…
						(4) Math word problems with a hip-hop background increase student learning motivation.
8	Derek Greenfield，2007	USA	Exploring the challenges and reflections faced by a middle-aged white teacher when teaching a hip-hop culture course.	The author himself. Middle‐aged. Duration is not clearly stated.	1.Qualitative research method. 2.Autoethnographic approach. Describing author`s experiences and thought processes in preparing and teaching this hip-hop culture course.	RQ1:(1) Asking students to recommend hip-hop songs and analyze the lyrics with them to enhance student engagement and mastery of the course content. (2) Encouraging students to express their personal views more freely, actively reflecting on his own position and perspectives, and openly discussing them in the classroom. RQ2: Paying special attention to how their identity and authority are perceiv…
9	Johan Söderman & Ove Sernhede，2016	Sweden	Exploring the academization of hip-hop culture and its relationship with teaching.	n=8. 8 famous hip-hop scholars and pioneers.	1.Qualitative research method. 2.The data collection is based on two empirical studies (1)Semi-structured interviews, lasting about 1 hour. (2)Participant observation and interviews with the Swedish Hip-hop group FDInc, lasting 1 year.	RQ1: Using hip-hop culture as a teaching tool. RQ2:(1) Hip-hop culture can help solve problems related to race, gender, and class. (2) Providing a platform for students to understand and interpret social realities. (3) Voluntary, open, and improvisational, in contrast to the formal learning formats of schools. (4) The creative processes in hip-hop culture, such as songwriting and dancing, making …
				A Swedish hip-hop group "Filthy Dozen Incorporated (FDInc)". Age 18-28. Duration is not clearly stated.
10	Tracy Hall & Barbara Martin，2013	USA	"Why" the use of culturally relevant teaching methods (such as hip-hop) and "how" hip-hop teaching methods affect African American students.	n=2. College. 2 African American students aged 23. 1 boy 1 girl. 1 week.	1.Qualitative research methods, specifically a single case study. 2.Semi-structured interviews and observation methods.	RQ1: The professor integrated hip-hop culture and music elements into the course teaching, creating a safe space that allows students to "speak up" and encouraging students to discuss social issues such as racism and gender discrimination. The professor's teaching methods, such as storytelling and incorporating African American vernacular, also help to attract student participation. RQ2: (1) Incr…
11	J Kim, I Pulido，2015	USA	Exploring the potential and limitations of using hip-hop music as a culturally relevant pedagogy (CRP).	n=20. High school. 13-24. The research does not explicitly mention the specific sample of research subjects, but it involves students in school and youth in the community. Duration is not clearly stated.	1. Qualitative research methods. 2.Data collection through observations and interviews of teacher practices and student responses.	RQ1: Hip-hop as a culturally relevant curriculum for urban youth of color，and incorporating hip-hop music into curricula. RQ2: (1) Increase student participation and engagement. (2) Foster a community-based cultural atmosphere. (3) Develop students' critical reading and writing skills. (4) Enhance students' sense of identity and agency. (5) Create more opportunities for students to express themse…
12	Anthony Broughton,2017	USA	What a male African American kindergarten-first grade teacher learned from the voices of his kindergarten and first-grade students through the use of hip-hop pedagogy and games.	n=13. Private child development center. 5 first-grade students (2 girls, 3 boys) and 8 kindergarten students (5 boys, 3 girls). 11 months.	1.Qualitative research methods, specifically autoethnography. 2.Collecting data includes observations in hip-hop pedagogy/games. Data analysis includes coding, thematic distillation, etc.	RQ1:The study uses the culturally relevant method of hip-hop pedagogy, integrating Freestyle rap，hip-hop cultural elements，and hip-hop music into classroom instruction. RQ2: It was better able to listen to and understand the voices of the children. This approach helps cultivate children's academic excellence, cultural competence, and critical consciousness.
13	Bryan J. Hains et al.，2020	USA	Exploring whether hip-hop pedagogy can be used as a catalyst for developing leadership and community transformation, both inside and outside the university classroom.	n=25. College. Age between 18-22 years. 10 females and 15 males. One semester.	1.Qualitative research methods, specifically case study. 2.Data collection including participant observation, semi-structured interviews, and course material analysis.	RQ1: (1) Create a safe, inclusive, and encouraging creative space for self-expression. (2) Enable students to connect course content with hip-hop music and culture, enhancing the sense of learning significance. (3) Encourages student engagement in the creative process, fostering creativity and civic awareness. RQ2: (1) Increasing their engagement and sense of belonging. (2) Helping students find …
14	ES Adjapong, C Emdin，2015	USA	Exploring the benefits of implementing hip-hop pedagogy in an urban science classroom.	n=486. 6th-grade students.68% African American, 26% Latino, 3% Asian, 2% White. Urban middle school. Duration is not clearly stated.	1.Qualitative research methods. 2.Data collection including focus group interviews, video analysis, Likert scale questionnaire, and participant observations and field notes.	RQ1: The study including Co-teaching and call-and-response teaching. RQ2: (1) Helping students better understand science content and enhance their agency and voice, as these methods are closely related to students' culture and life. (2) Students expressed that they enjoy listening to hip-hop music in the classroom, as they feel more comfortable and at ease.
15	ES Adjapong, C Emdin，2021	USA	The impact of implementing hip-hop pedagogy in urban middle school science classrooms on female students' teaching and learning.	n=55. Urban middle school. 6th grade. 6 months.	1.Mixed-methods study. (1) Qualitative research methods including student focus group interviews, video clips, and participant observation and field notes. (2) Quantitative research methods including "Increasing students' interest in STEM" survey questionnaire, analyzing the survey data using Wilcoxon paired t-test. 2. Data collection methods include student focus group interviews, video recordin…	RQ1: (1) Hip-hop pedagogy was implemented in the science classroom, such as having students create hip-hop songs to memorize experimental safety rules.(2) Hip-hop-themed interactive activities were designed, such as students acting out molecular simulations of phase changes. RQ2:(1) Students gained a deeper understanding of science content. (2) Increased self-confidence. (3) Students developed mo…
